# Supplementary material for: Mitotic catastrophe heterogeneity: implications for prognosis and immunotherapy in hepatocellular carcinoma
Source: PubMed Central journal article supplement (PMC11250588; doi:10.3389/fimmu.2024.1409448), 2024-07-01

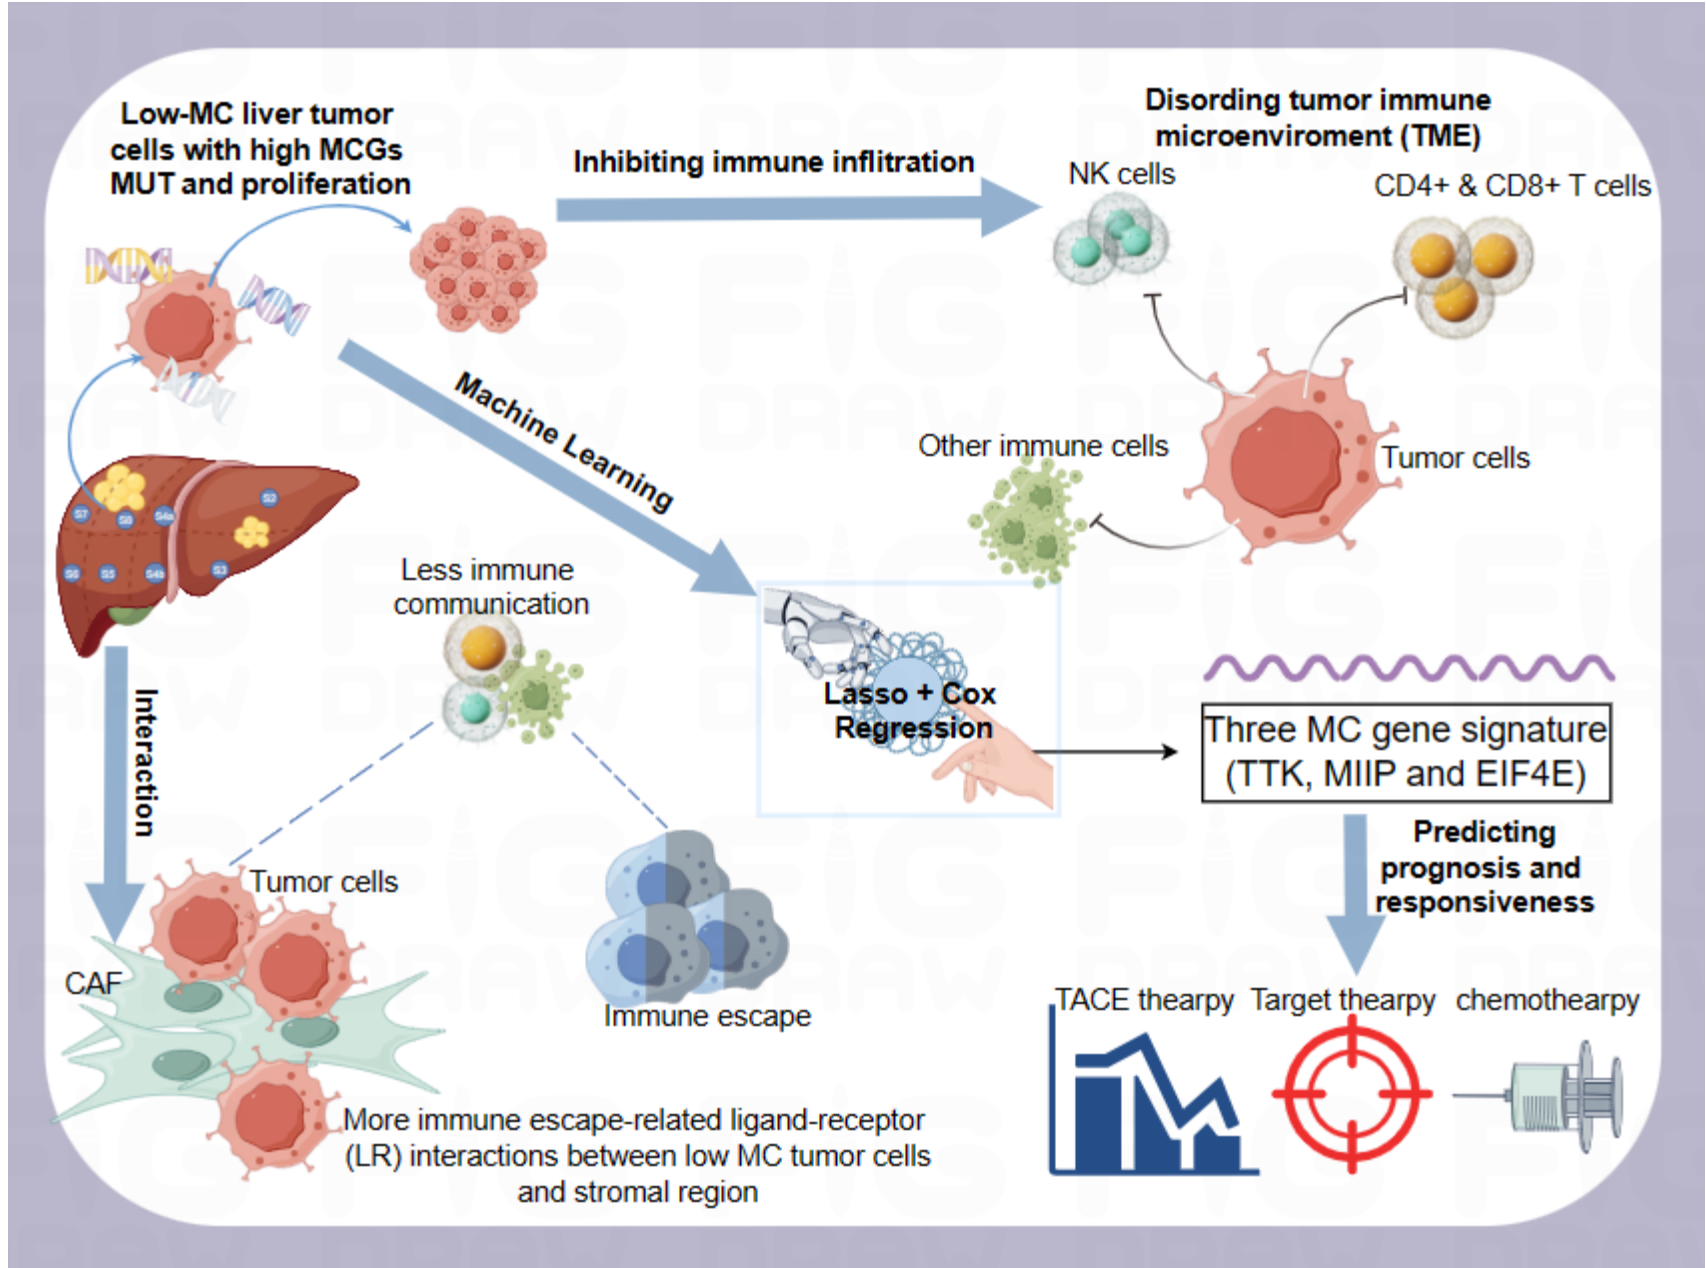

Supplement: DataSheet_1.pdf [file DataSheet_1.pdf]
